# Supplementary material for: Bone Turnover Is Suppressed in Insulin Resistance, Independent of Adiposity
Source: Oxford University Press journal article supplement (doi:10.1210/jc.2016-3282), 2017-01-23
Supplement: jc.2016-3282_Supplementary_Table_1.pdf [file jc.2016-3282_Supplementary_Table_1.pdf]

**Supplementary Table 1. Multivariate regression using waist circumference instead of visceral fat area.**

| Dependent variable                             | Model | Variables retained in model | Adjusted R <sup>2</sup> | Standardized coefficients $\beta$ | P value |
|------------------------------------------------|-------|-----------------------------|-------------------------|-----------------------------------|---------|
| Baseline osteocalcin                           | 1b    | Waist Circ**                | .150                    | -.403                             | 0.001   |
| Baseline CTx                                   | 2b    | Waist circ <sup>^</sup>     | .226                    | -.487                             | <0.001  |
| Change in osteocalcin with insulin stimulation | 3b    | M value <sup>^^^</sup>      | .071                    | -.290                             | 0.014   |
| Change in CTx with insulin stimulation         | 4c    | Waist circ <sup>†††</sup>   | .101                    | .337                              | 0.004   |
| Baseline P1NP                                  | 5b    | M value <sup>Ω Ω</sup>      | .067                    | .283                              | 0.017   |

\*\* Age (p=0.7), subcutaneous fat area (p=0.9), GIR/FFM (p=0.2), Ln(baseline insulin) (p=0.3), and baseline glucose (p=0.4) were not retained in the regression model

<sup>^</sup> Age (p=0.4), subcutaneous fat area (p=0.5), GIR/FFM (p=0.2), Ln(baseline insulin) (p=0.5), and baseline glucose (p=0.5) were not retained in the regression model

<sup>^^^</sup> Age (p=0.1), subcutaneous fat area (p=0.3), waist circumference (p=0.5), Ln(baseline insulin) (p=0.7), and baseline glucose (p=0.5) were not retained in the regression model

<sup>†††</sup> Age (p=0.2), subcutaneous fat area (p=0.7), GIR/FFM (p=0.06), Ln(baseline insulin) (p=0.6), and baseline glucose (p=0.1) were not retained in the regression model

<sup>Ω Ω</sup> Age (p=1.0), subcutaneous fat area (p=0.1), waist circumference (p=0.2), Ln(baseline insulin) (p=0.4), and baseline glucose (p=0.3) were not retained in the regression model

N.B. Baseline insulin vs Ln(baseline insulin) made no difference to the models, apart from changing the p=values for insulin.
